# Supplementary material for: Configuring hierarchical Ni/NiO 3D-network assisted with bamboo cellulose nanofibers for high-performance Ni–Zn aqueous batteries
Source: Royal Society of Chemistry journal article supplement (doi:10.1039/d0nr03608k), 2020-01-01
Supplement: d0nr03608k1.pdf [file d0nr03608k1.pdf]

## Supported Information

**Configuring hierarchical Ni/NiO 3D-network assisted with bamboo cellulose nanofibers  
for high-performance Ni-Zn aqueous batteries**

Lili Jiang <sup>a</sup>, Lei Li <sup>a</sup>, Sha Luo <sup>a</sup>, Han Xu <sup>a</sup>, Liaoyuan Xia <sup>a</sup>, Hankun Wang <sup>b</sup>, Xinge Liu <sup>b</sup>,  
Yiqiang Wu <sup>a</sup>, Yan Qing <sup>a, \*</sup>

*a School of Materials Science and Engineering, Central South University of Forestry and  
Technology, Changsha 410004, Hunan, China.*

*b Department of Biomaterials, Key Laboratory of Bamboo and Rattan Science and  
Technology, International Centre for Bamboo and Rattan, Beijing, 100102.*

*\* School of Materials Science and Technology, Central South University of Forestry and  
Technology, Changsha, 410004, China. E-mail: qingyan0429@163.com*

### Calculations:

Specific capacity values of single electrode and battery were calculated from the galvanostatic discharge curves by the following equation:

$$C = \frac{It}{m}$$

where C is specific capacity (mAh.g<sup>-1</sup>), m refers to the loading mass of active materials (g), I corresponds to the discharging density (A), t represents the discharge time (h).

The energy density (E) and power density (P) were calculated from the equations as below:

$$E = \frac{\int_0^{\Delta t} IV(t) dt}{\Delta t}$$
$$P = \frac{E}{1000 \times \Delta t}$$

where the unit of E is Wh.kg<sup>-1</sup> and that of P is kW.kg<sup>-1</sup>.  $\Delta t$  is the discharge time (h), I corresponds to the discharging density (A), V refers to the discharging voltage (V) and dt represents time differential.

The mass ratios of bamboo cellulose nanofibers to the nickel of Ni(NO<sub>3</sub>)<sub>2</sub> were calculated from the following equations:

$$m_r = \frac{m_1}{n \times N \div 1000}$$

where the unit of  $m_r$  is g/g.  $m_1$  is the mass of bamboo cellulose nanofibers (g), which is 0.2 in this experiment.  $n$  is the amount of Ni(NO<sub>3</sub>)<sub>2</sub> (mmol, and  $n=2,4,6$ ).  $N$  is the molar mass of nickel ( $N=58.69$ ).

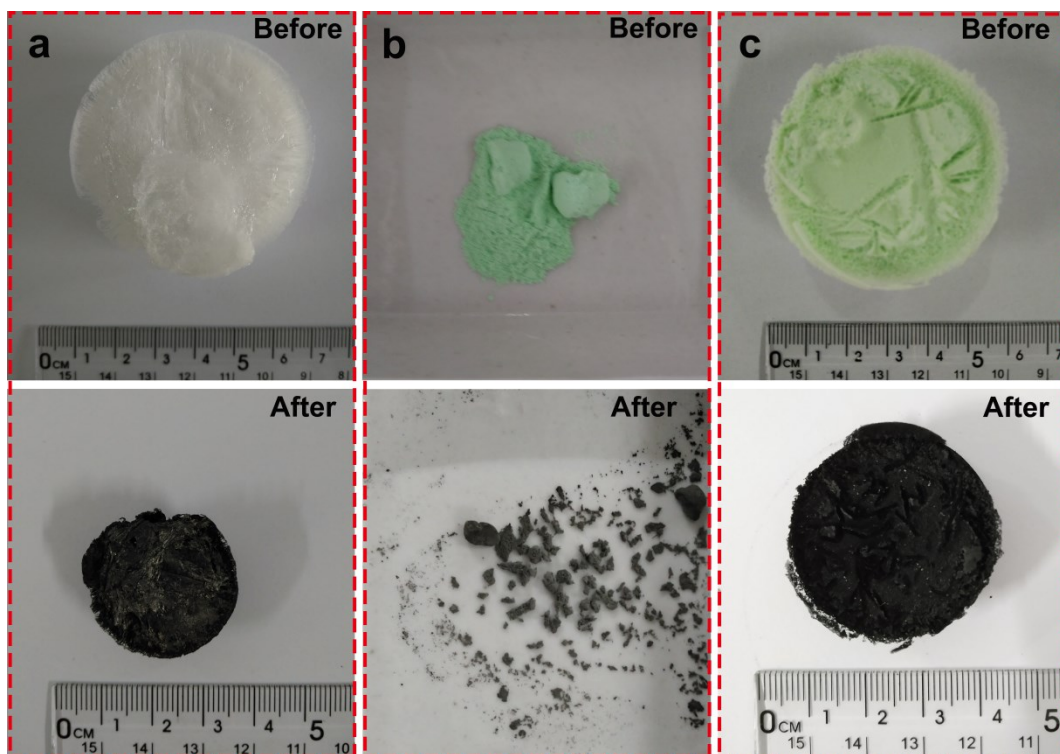

**Figure S1.** The macroscopic morphology of (a) BCF, (b) pure nickel, and (c) Ni-BCF before and after calcination

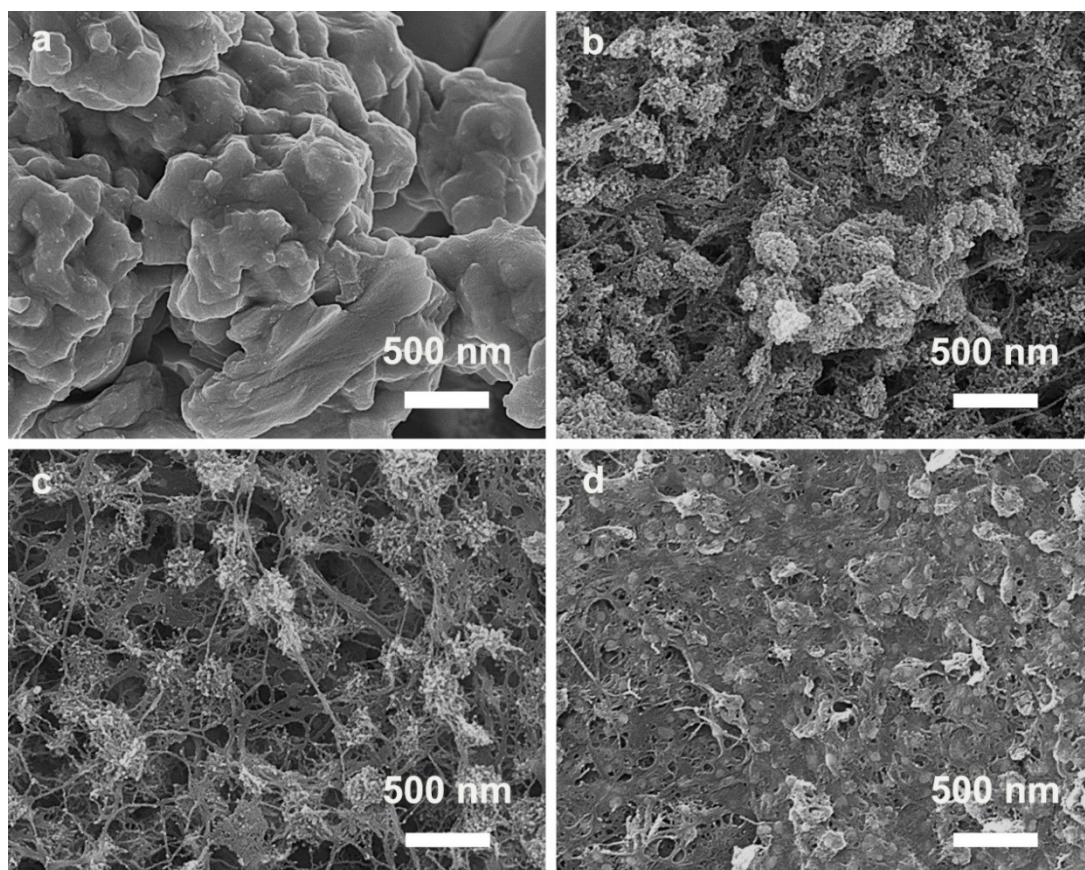

**Figure S2.** The SEM images of (a) pure Ni, (b) Ni-BCF0.57, (c) Ni-BCF0.85 and (d) Ni-BCF1.7

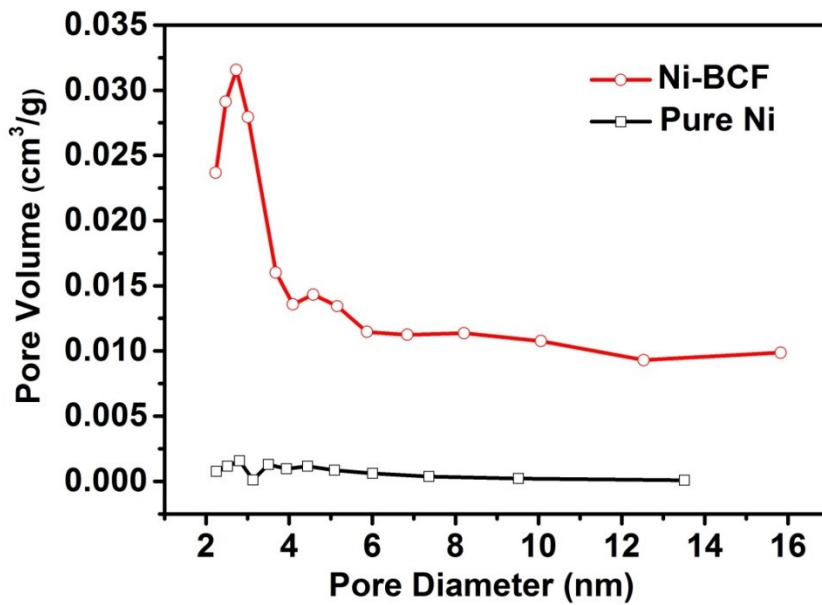

**Figure S3.** The pore size distribution of Ni-BCF and pure Ni

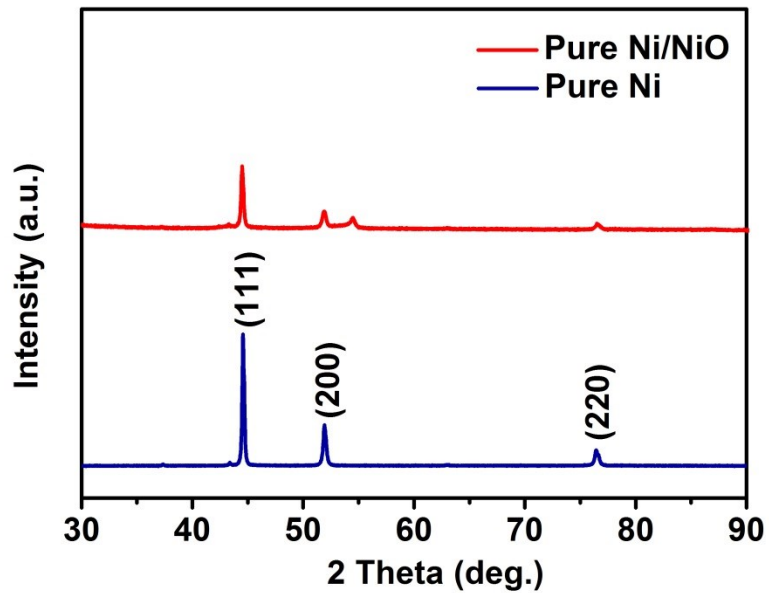

**Figure S4.** XRD pattern of pure Ni and pure Ni/NiO

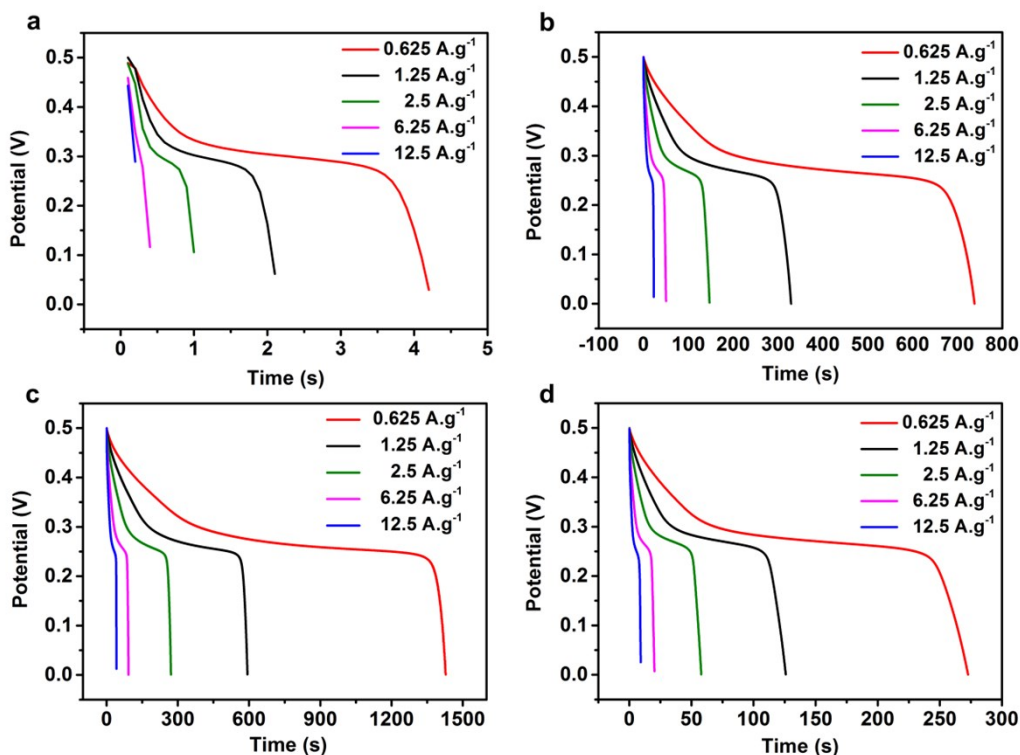

**Figure S5.** The discharge curves of (a) pure Ni, (b) Ni-BCF<sub>0.57</sub>, (c) Ni-BCF<sub>0.85</sub>, and (d) Ni-BCF<sub>1.7</sub> at different current densities

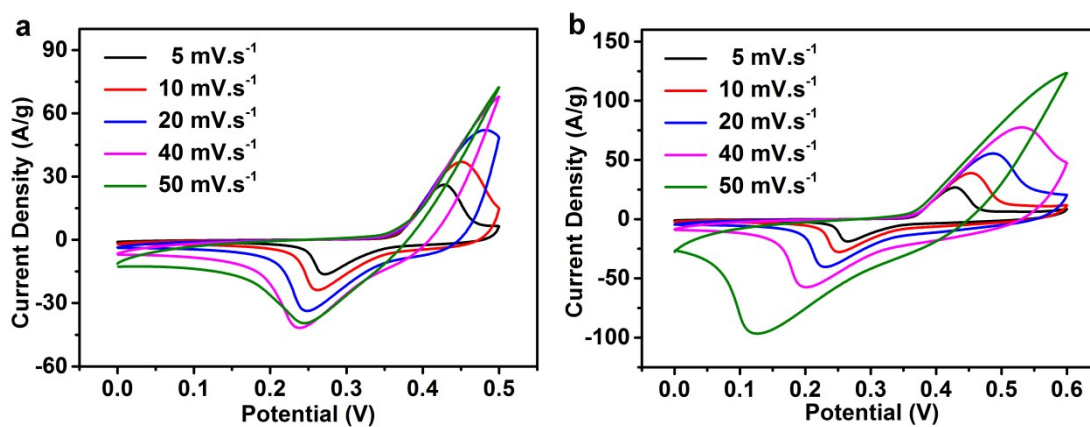

**Figure S6.** CV curves of Ni/NiO-BCF<sub>0.85</sub> electrode with different potential window of (a) 0-0.5V and (b) 0-0.6V

**Table S1.** Cycling performance of different nickel-based electrodes

| Electrode structure                                            | Electrolyte | Cycling stability       | Reference        |
|----------------------------------------------------------------|-------------|-------------------------|------------------|
| Ni/NiO-BCF hierarchical networks                               | 6 M KOH     | 94.5% after 2000 cycles | <b>This work</b> |
| Porous net-like $\beta$ -Ni(OH) <sub>2</sub> / $\gamma$ -NiOOH | 1 M KOH     | 81% after 1000 cycles   | 1                |

|                                                                              |          |                         |   |
|------------------------------------------------------------------------------|----------|-------------------------|---|
| NiCo <sub>2</sub> O <sub>4</sub> @MnO <sub>2</sub> core-shell nanowire array | 1 M LiOH | 88% after 2000 cycles   | 2 |
| Ni-MOF nanosheet/carbon nanotube fiber                                       | 2 M KOH  | 79.6% after 2000 cycles | 3 |
| Co <sub>3</sub> O <sub>4</sub> @NiO nanostrip@nanorod arrays                 | 6 M KOH  | 96% after 1000 cycles   | 4 |
| Ni <sub>3</sub> S <sub>2</sub> honeycomb-like nanosheet                      | 1 M KOH  | 89% after 1000 cycles   | 5 |
| Ni(OH) <sub>2</sub> nanosheets/nitrogen-doped graphene                       | 1 M KOH  | 93% after 1000 cycles   | 6 |

### References:

- [1] Yuan Y, Xia X, Wu J, Yang J, Chen Y, Guo SY. Nickel foam-supported porous Ni(OH)<sub>2</sub>/NiOOH composite film as advanced pseudocapacitor material. *Electrochimica Acta*, 2011, 56(6): 2627-2632.
- [2] Yu L, Zhang G, Yuan C, Lou X. Hierarchical NiCo<sub>2</sub>O<sub>4</sub>@MnO<sub>2</sub> core-shell heterostructured nanowire arrays on Ni foam as high-performance supercapacitor electrodes. *Chemical Communication*, 2013, 49(2): 137-139.
- [3] Li C, Zhang Q, Li T, He B, Man P, Zhu Z, Zhou Z, Wei L, Zhang K, Hong G, Yao Y. Nickel metal-organic framework nanosheets as novel binder-free cathode for advanced fibrous aqueous rechargeable Ni-Zn battery. *Journal of Materials Chemistry A*, 2020, 8(6): 3262-3269.
- [4] Lu Z, Wu X, Lei X, Li Y, Sun X. Hierarchical nanoarray materials for advanced nickel-zinc batteries. *Inorganic Chemistry Frontiers*, 2015, 2(2): 184-187.
- [5] Fu W, Zhao Y, Mei J, Wang F, Han W, Wang F, Xie E. Honeycomb-like Ni<sub>3</sub>S<sub>2</sub> nanosheet arrays for high-performance hybrid supercapacitors. *Electrochimica Acta*, 2018, 283: 737-743.
- [6] Wu X, Wu HB, Xiong W, Le Z, Sun F, Liu F, Chen J, Zhu Z, Lu Y. Robust iron nanoparticles with graphitic shells for high-performance Ni-Fe battery. *Nano Energy*, 2016, 30: 217-224.

**Table S2.** Cycling performance of different aqueous rechargeable batteries

| Battery    | Electrolyte                       | Cycling stability       | Reference        |
|------------|-----------------------------------|-------------------------|------------------|
| Ni/NiO//Zn | 6 M KOH+0.5 M Zn(Ac) <sub>2</sub> | 94.5% after 1000 cycles | <b>This work</b> |

|                                               |                                    |                          |   |
|-----------------------------------------------|------------------------------------|--------------------------|---|
| Ni-MOF/CNTF//Zn                               | 2M KOH saturated with ZnO          | 89% after 600 cycles     | 1 |
| Ni(OH) <sub>2</sub> //ZnO/C                   | 6M KOH saturated with ZnO          | 89% after 800 cycles     | 2 |
| NiCo <sub>2</sub> O <sub>4</sub> //Zn         | 6 M KOH+0.1M Zn(Ac) <sub>2</sub>   | 63.23% after 1000 cycles | 3 |
| NiO-CNTs//Zn                                  | 1 M KOH +10 mM Zn(Ac) <sub>2</sub> | 65% after 500 cycles     | 4 |
| Co <sub>3</sub> O <sub>4</sub> @NiO NSRAs//Zn | 6M KOH saturated with ZnO          | 89% after 500 cycles     | 5 |
| CC-CF@NiO//CC-CF@ZnO                          | 2M KOH saturated with ZnO          | 91.45% after 1000 cycles | 6 |
| NCHO//Zn                                      | 6 M KOH                            | 60% after 1000 cycles    | 7 |
| Ni(OH) <sub>2</sub> /NG//Fe                   | 1 M KOH                            | 93% after 1000 cycles    | 8 |

### References:

- [1] Li C, Zhang Q, Li T, He B, Man P, Zhu Z, Zhou Z, Wei L, Zhang K, Hong G, Yao Y. Nickel metal–organic framework nanosheets as novel binder-free cathode for advanced fibrous aqueous rechargeable Ni–Zn battery. *Journal of Materials Chemistry A*, 2020, 8(6): 3262-3269.
- [2] Zeng X, Yang Z, Meng J, Chen L, Chen H, Qin H. The cube-like porous ZnO/C composites derived from metal organic framework-5 as anodic material with high electrochemical performance for Ni–Zn rechargeable battery. *Journal of Power Sources*, 2019, 438: 226986.
- [3] Lu Z, Wu X, Lei X, Li Y, Sun X. Hierarchical nanoarray materials for advanced nickel–zinc batteries. *Inorganic Chemistry Frontiers*, 2015, 2(2): 184-187.
- [4] Wang X, Li M, Wang Y, Chen B, Zhu Y, Wu Y. A Zn–NiO rechargeable battery with long lifespan and high energy density. *Journal of Materials Chemistry A*, 2015, 3(16): 8280-8283.
- [5] Huang M, Zhou X, Hou X, Wang S, Zhuang Y, Jia H, Guan M. Intermediate phase  $\alpha$ - $\beta$ -Ni<sub>1-x</sub>Co<sub>x</sub>(OH)<sub>2</sub>/carbon nanofiber hybrid material for high performance nickel-zinc battery. *Electrochimica Acta*, 2018, 298(1): 127-133.
- [6] Liu J, Guan C, Zhou C, Fan Z, Ke Q, Zhang G, Liu C, Wang J. A flexible quasi-solid-state nickel-zinc battery with high energy and power densities based on 3D electrode design. *Advance Materials*, 2016, 28(39): 8732-8739.

- [7] Huang Y, Ip WS, Lau YY, Sun J, Zeng J, Yeung NSS, Ng WS, Li H, Pei Z, Xue Q, Wang Y, Yu J, Hu H, Zhi C. Weavable, conductive yarn-based NiCo//Zn textile battery with high energy density and rate capability. *ACS Nano*, 2017, 11(9): 8953-8961.
- [8] Wu X, Wu H Xiong W, Le Z, Sun F, Liu F, Chen J, Zhu Z, Lu Y. Robust iron nanoparticles with graphitic shells for high-performance Ni-Fe battery. *Nano Energy*, 2016, 30: 217-224.
